# Supplementary material
Source: PubMed Central journal article supplement (PMC6736292)
Supplement: supp_t1_dez111.pdf [file supp_t1_dez111.pdf]

**Supplementary Table S1 Pre-pregnancy distance to roadways and particulate matter exposures and risk ratios of spontaneous abortion stratified by gestational length among women in the Nurses' Health Study II (1990-2008).**

| SAB/pregnancies                              | Fully Adjusted RR (95% CI) of SAB* |                          |                           |
|----------------------------------------------|------------------------------------|--------------------------|---------------------------|
|                                              | <8 Weeks<br>2520/35025             | 8–11 Weeks<br>2690/31622 | 12–19 Weeks<br>1389/28485 |
| Distance to A1–A3 roadway, meters            |                                    |                          |                           |
| 0–199                                        | 1.0 (Ref)                          | 1.0 (Ref)                | 1.0 (Ref)                 |
| 200+                                         | 0.97 (0.90, 1.05)                  | 1.03 (0.95, 1.11)        | 0.98 (0.88, 1.08)         |
| 1-year average exposure per IQR increase†    |                                    |                          |                           |
| PM <sub>10</sub>                             | 1.05 (1.00, 1.10)                  | 1.01 (0.96, 1.06)        | 0.99 (0.92, 1.06)         |
| PM <sub>2.5–10</sub>                         | 1.05 (0.99, 1.11)                  | 1.03 (0.98, 1.09)        | 1.05 (0.97, 1.13)         |
| PM <sub>2.5</sub>                            | 1.04 (0.98, 1.10)                  | 0.98 (0.93, 1.03)        | 0.93 (0.86, 1.00)         |
| 2-year average exposure per IQR increase     |                                    |                          |                           |
| PM <sub>10</sub>                             | 1.04 (0.98, 1.09)                  | 1.00 (0.95, 1.05)        | 0.98 (0.91, 1.06)         |
| PM <sub>2.5–10</sub>                         | 1.04 (0.98, 1.11)                  | 1.02 (0.97, 1.08)        | 1.05 (0.97, 1.13)         |
| PM <sub>2.5</sub>                            | 1.02 (0.96, 1.08)                  | 0.97 (0.92, 1.02)        | 0.92 (0.85, 0.99)         |
| Cumulative average exposure per IQR increase |                                    |                          |                           |
| PM <sub>10</sub>                             | 1.02 (0.97, 1.08)                  | 1.00 (0.96, 1.05)        | 0.99 (0.92, 1.07)         |
| PM <sub>2.5–10</sub>                         | 1.04 (0.98, 1.10)                  | 1.02 (0.97, 1.08)        | 1.06 (0.98, 1.14)         |
| PM <sub>2.5</sub>                            | 0.99 (0.94, 1.05)                  | 0.98 (0.93, 1.03)        | 0.92 (0.86, 0.99)         |

PM: particulate matter, RR: risk ratio, SAB: spontaneous abortion. The reference group for SAB <8 weeks was all pregnancies, the reference group for SAB 8–11 weeks was all pregnancies lasting beyond 8 weeks and the reference group for SAB 12–19 weeks was all pregnancies lasting beyond 12 weeks.

\*Models are adjusted for age (continuous), smoking status (never, former, current, missing), year of pregnancy (continuous), BMI (categories), history of infertility (no, yes, and missing), current multivitamin use (no, yes and missing), marital status (married, not married), race (white and other), US region (Northeast, Midwest, West and South), census tract-level median income (continuous) and median home value (continuous).

†An IQR increase was 7.9 µg/m<sup>3</sup> for PM<sub>10</sub>, 5.8 µg/m<sup>3</sup> for PM<sub>2.5–10</sub> and 4.5 µg/m<sup>3</sup> for PM<sub>2.5</sub>.
