# Supplementary material
Source: PubMed Central journal article supplement (PMC6736292)
Supplement: supp_t2_dez111.pdf [file supp_t2_dez111.pdf]

**Supplementary Table SII Baseline demographics in 1989 comparing women included in the main analysis and the case-crossover analysis in the Nurses' Health Study II.**

| Number of women                         | Main analysis<br>19 309 | Case crossover<br>3585 |
|-----------------------------------------|-------------------------|------------------------|
| Maternal age, years                     | 30.6 (3.6)              | 29.9 (3.4)             |
| Maternal BMI, kg/m <sup>2</sup>         | 22.8 (4.0)              | 22.5 (3.8)             |
| Pre-pregnancy smoking, <i>n</i> (%)     |                         |                        |
| Never                                   | 13 558 (70.2)           | 2555 (71.3)            |
| Former                                  | 3903 (20.2)             | 718 (20.0)             |
| Current                                 | 1823 (9.4)              | 309 (8.6)              |
| Multivitamin use, <i>n</i> (%)          | 8725 (45.2)             | 1650 (46.0)            |
| Ever OC use                             |                         |                        |
| Never                                   | 3419 (17.7)             | 652 (18.2)             |
| Past                                    | 11 534 (59.7)           | 1988 (55.5)            |
| Current                                 | 4337 (22.5)             | 943 (26.3)             |
| History of infertility, <i>n</i> (%)    | 2868 (14.9)             | 458 (12.8)             |
| Married, <i>n</i> (%)                   | 15 020 (77.8)           | 2527 (70.5)            |
| Caucasian, <i>n</i> (%)                 | 17 992 (93.2)           | 3361 (93.8)            |
| Parity, <i>n</i> (%)                    |                         |                        |
| Nulliparous                             | 8844 (45.8)             | 2114 (59.0)            |
| 1                                       | 5648 (29.3)             | 895 (25.0)             |
| 2                                       | 3550 (18.4)             | 422 (11.8)             |
| 3+                                      | 1262 (6.5)              | 153 (4.3)              |
| Region of residence, <i>n</i> (%)       |                         |                        |
| Northeast                               | 6384 (34.7)             | 1176 (34.0)            |
| South                                   | 6218 (33.8)             | 1202 (34.7)            |
| Midwest                                 | 2921 (15.9)             | 542 (15.7)             |
| West                                    | 2863 (15.6)             | 540 (15.6)             |
| Past year PM <sub>2.5</sub> exposure    | 17.4 (3.7)              | 17.5 (3.6)             |
| Past year PM <sub>2.5-10</sub> exposure | 13.0 (6.3)              | 13.1 (6.2)             |
| Past year PM <sub>10</sub> exposure     | 30.5 (8.1)              | 30.7 (8.0)             |
| Total gravidity by 2009, <i>n</i> (%)   |                         |                        |
| 1                                       | 1571 (8.1)              | 0 (0.0)                |
| 2                                       | 5001 (25.9)             | 247 (6.9)              |
| 3                                       | 5392 (27.9)             | 870 (24.3)             |
| 4+                                      | 7345 (38.0)             | 2468 (68.8)            |
| Total SABs by 2009, <i>n</i> (%)        |                         |                        |
| 0                                       | 11 660 (60.4)           | 0 (0.0)                |
| 1                                       | 4894 (25.4)             | 2069 (57.1)            |
| 2+                                      | 2755 (14.3)             | 1516 (42.3)            |

OC: oral contraceptive.
