# Supplementary material
Source: PubMed Central journal article supplement (PMC6736292)
Supplement: supp_t4_dez111.pdf [file supp_t4_dez111.pdf]

**Supplementary Table SIV** Sensitivity analyses for the association between 1-year average exposure to PM and risk of SAB in the Nurses' Health Study II (1990–2008).

| Subgroup                                          | RR* (95%CI) for 1-year average exposure per IQR <sup>†</sup> |                      |                   |
|---------------------------------------------------|--------------------------------------------------------------|----------------------|-------------------|
|                                                   | PM <sub>2.5</sub>                                            | PM <sub>2.5–10</sub> | PM <sub>10</sub>  |
| All participants (n = 35 025)                     | 0.98 (0.95, 1.02)                                            | 1.03 (1.00, 1.07)    | 1.01 (0.98, 1.04) |
| Never smokers (n = 24 889)                        | 0.97 (0.93, 1.00)                                            | 1.04 (1.00, 1.08)    | 1.01 (0.97, 1.04) |
| Women <35 years (n = 17 513)                      | 0.98 (0.93, 1.03)                                            | 1.05 (0.99, 1.11)    | 1.01 (0.96, 1.07) |
| No history of infertility (n = 29 285)            | 1.00 (0.96, 1.03)                                            | 1.05 (1.01, 1.09)    | 1.03 (1.00, 1.06) |
| Married & no hormonal contraception (n = 25 032)  | 0.98 (0.94, 1.02)                                            | 1.04 (1.00, 1.09)    | 1.02 (0.98, 1.05) |
| First eligible pregnancy (n = 19 309)             | 1.00 (0.96, 1.05)                                            | 1.03 (0.98, 1.08)    | 1.02 (0.98, 1.06) |
| Only live births as controls (n = 33 182)         | 0.99 (0.96, 1.02)                                            | 1.02 (0.99, 1.06)    | 1.01 (0.98, 1.04) |
| Only healthy term births as controls (n = 30 637) | 0.99 (0.96, 1.02)                                            | 1.02 (0.99, 1.05)    | 1.01 (0.98, 1.04) |
| ≥ 1 SAB by 2009 (n = 17 294)                      | 1.01 (0.98, 1.04)                                            | 1.04 (1.01, 1.06)    | 1.02 (1.00, 1.05) |
| ≥ 2 SABs by 2009 (n = 7692)                       | 1.03 (0.99, 1.06)                                            | 1.04 (1.01, 1.07)    | 1.04 (1.01, 1.07) |
| Stratified by US Region                           |                                                              |                      |                   |
| Northeast (n = 11 815)                            | 1.00 (0.93, 1.08)                                            | 0.98 (0.89, 1.07)    | 0.99 (0.92, 1.06) |
| Midwest (n = 11 996)                              | 0.96 (0.90, 1.03)                                            | 1.06 (1.00, 1.12)    | 1.02 (0.96, 1.09) |
| West (n = 5666)                                   | 0.99 (0.94, 1.04)                                            | 1.03 (0.98, 1.08)    | 1.01 (0.97, 1.05) |
| South (n = 5548)                                  | 0.98 (0.90, 1.07)                                            | 1.10 (0.98, 1.23)    | 1.06 (0.92, 1.22) |

\*Models are adjusted for age (continuous), smoking status (never, former, current and missing), year of pregnancy (continuous), BMI (categories), history of infertility (no, yes and missing), current multivitamin use (no, yes and missing), marital status (married and not married), race (white and other), region (Northeast, Midwest, West and South), census tract-level median income (continuous) and median home value (continuous).

<sup>†</sup>An IQR increase was 7.9 µg/m<sup>3</sup> for PM<sub>10</sub>, 5.8 µg/m<sup>3</sup> for PM<sub>2.5–10</sub>, 4.5 µg/m<sup>3</sup> for PM<sub>2.5</sub>.
