# Supplementary material
Source: PubMed Central journal article supplement (PMC6736292)

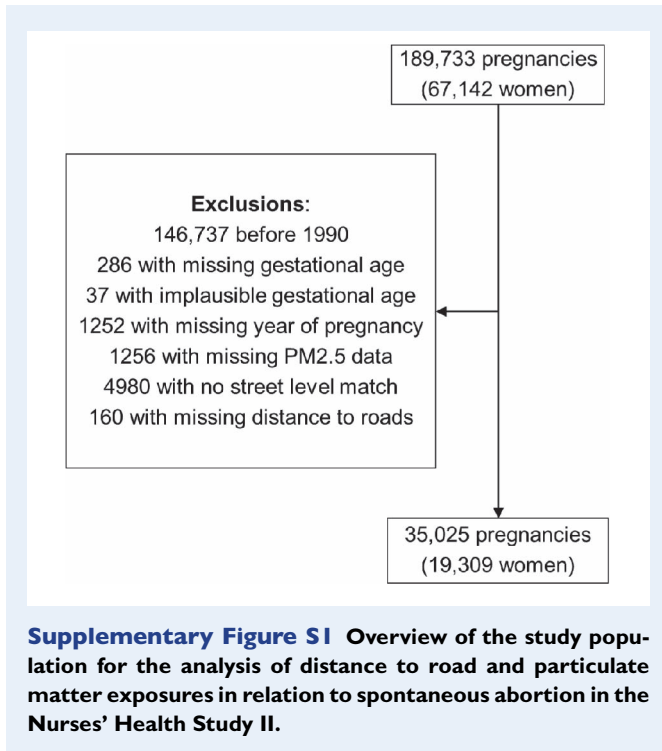

Supplement: supp_f1_dez111.pdf [file supp_f1_dez111.pdf]
